# Supplementary material
Source: MDPI journal article supplement (https://www.mdpi.com/2673-9976/20/1/29)
Supplement: s1 [file s1]

IECBM  
2022

# The 2nd International Electronic Conference on Biomolecules: BIOMACROMOLECULES AND THE MODERN WORLD CHALLENGES

01-15 NOVEMBER 2022 | ONLINE

## Modeling and simulation of magnetoliposomes formation by encapsulation of core-shell, magnetite-chitosan nanoparticles in liposomes enabled by a low-cost microfluidic system

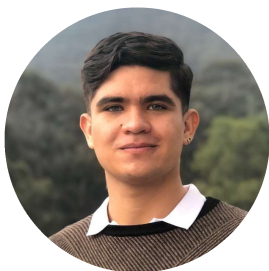

Andres Mantilla-Orozco  
MSc student<sup>(1)</sup>

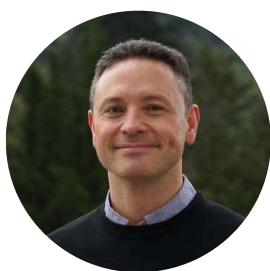

Juan C. Cruz PhD<sup>(1)</sup>

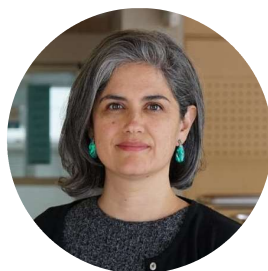

Carolina Muñoz-Camargo PhD<sup>(1)</sup>

Andres Mantilla-Orozco<sup>(1)</sup>, Cristian Rodríguez<sup>(1)</sup>, Isabella Quiroz<sup>(1)</sup>, Daniel Forero <sup>(1)</sup>, María Camila Monsalve<sup>(1)</sup>, Carlos E. Torres<sup>(1)</sup>, Johann F. Osma PhD<sup>(2)</sup>, Carolina Muñoz-Camargo. PhD<sup>(1)</sup>, Luis H. Reyes<sup>(3)</sup>, Valentina Quezada<sup>(1)</sup>, Juan C. Cruz. PhD <sup>(1)</sup>

*(1) Department of Biomedical Engineering.*

*(2) Department of Chemical and Food Engineering*

*(3) Department of Electrical and Electronics Engineering*

# Nanostructured materials applications

## Nanobiotechnology

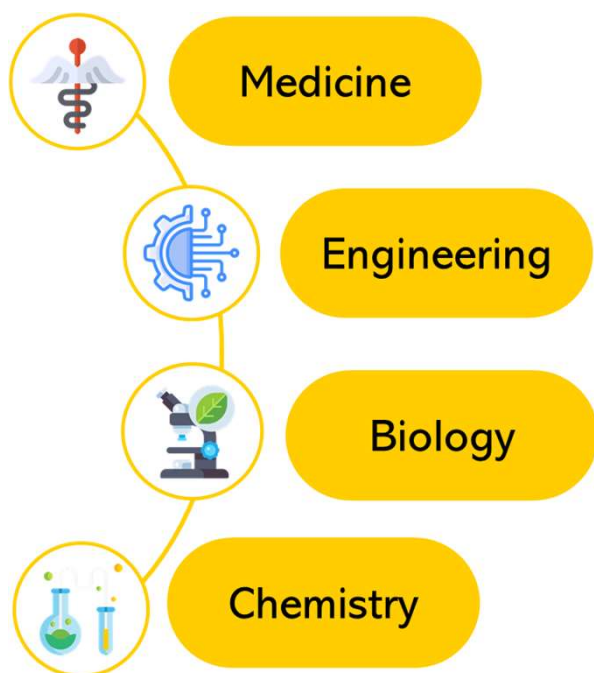

Michael Goldberg, Robert Langer, and Xinqiao Jia. Nanostructured materials for applications in drug delivery and tissue engineering. *Journal of Biomaterials Science, Polymer Edition*, 18(3):241–268, 2007.  
 Oliver Kayser, A Lemke, and Norma Hernandez-Trejo. The impact of nanobiotechnology on the development of new drug delivery systems. *Current pharmaceutical biotechnology*, 6(1):3–5, 2005.  
 Daniel G Anderson, Jason A Burdick, and Robert Langer. Smart biomaterials. *Science*, 305(5692):1923–1924, 2004.

**IECBM**  
2022

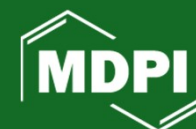

# Nanostructured materials applications

## Nanobiotechnology

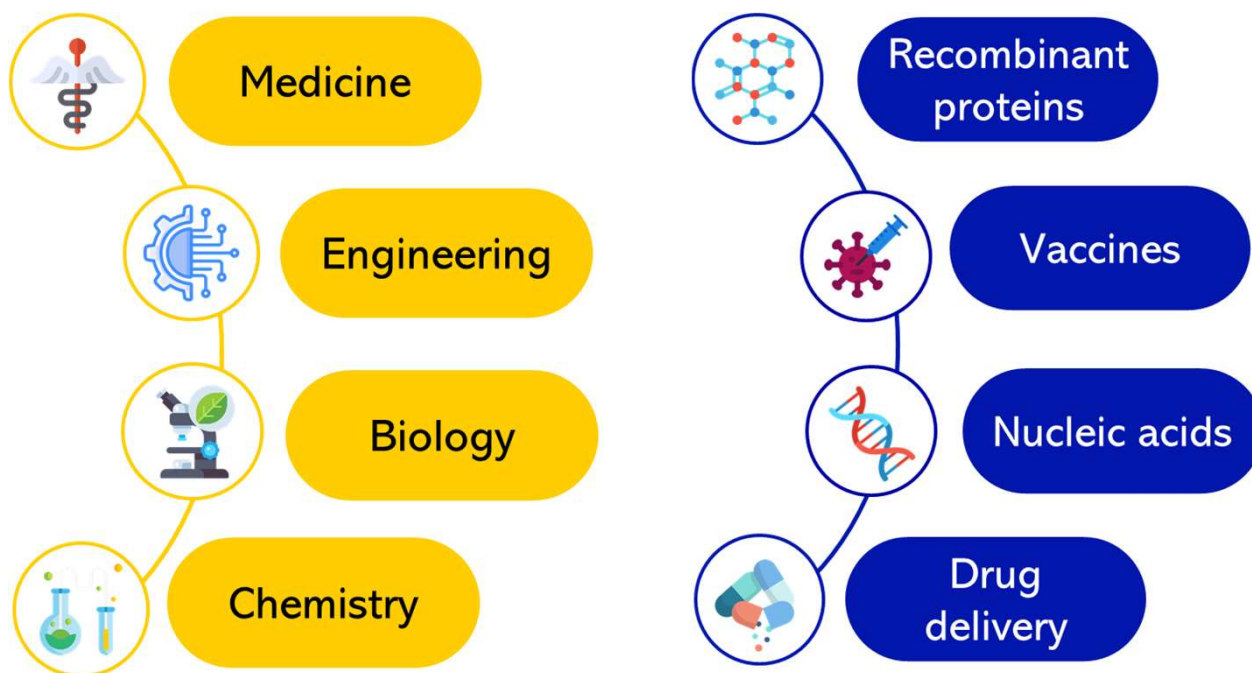

Andrei Kolmakov and Martin Moskovits. Chemical sensing and catalysis by one-dimensional metal-oxide nanostructures. *Annu. Rev. Mater. Res.*, 34:151–180, 2004.

Lubhandwa S Biswaro, Maurício G da Costa Sousa, Taia Rezende, Simoni C Dias, and Octavio L Franco. Antimicrobial peptides and nanotechnology, recent advances and challenges. *Frontiers in microbiology*, 9:855, 2018.

IECBM  
2022

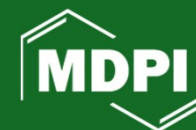

# Nanostructured materials applications

## Nanobiotechnology

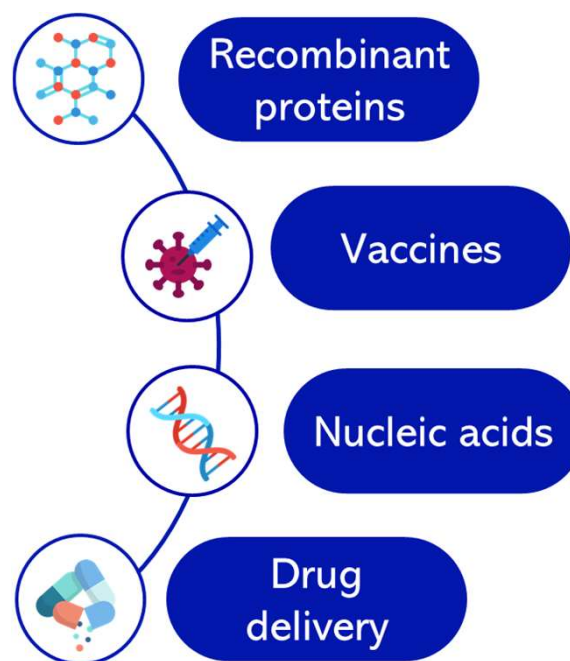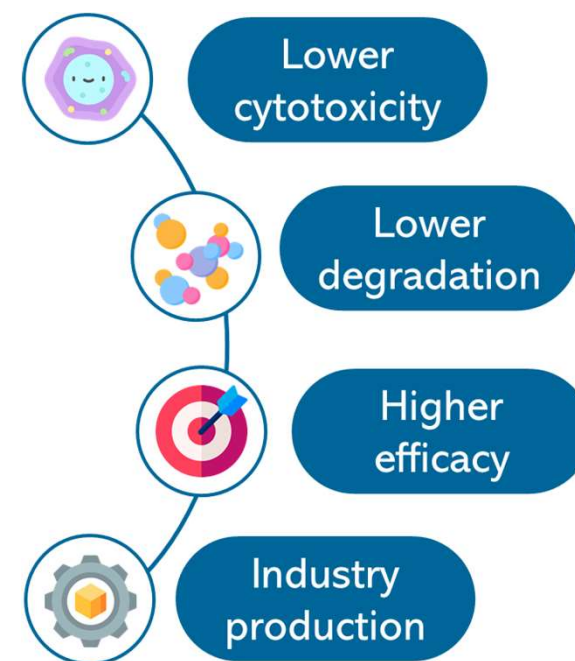

# Nanotransporters advantages like drug delivery systems

## Nanobiotechnology

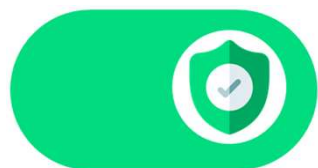

Protection of peptides, vaccines and desired drugs against extracellular degradation

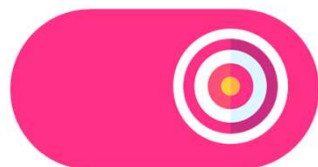

Selectivity of the target therapy

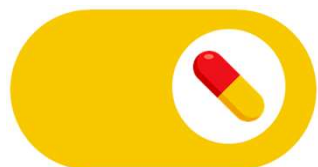

Improvement of the pharmacokinetic profile



# Nanotransporters advantages like drug delivery systems

## Nanobiotechnology



Protection of peptides, vaccines and desired drugs against extracellular degradation



Selectivity of the target therapy



Improvement of the pharmacokinetic profile

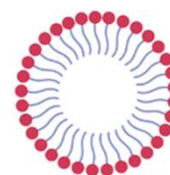

Micelles

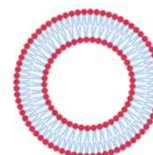

Liposomes

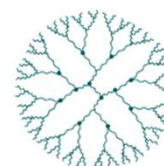

Dendrimers

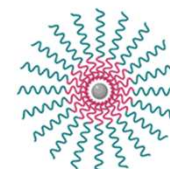

Polymeric nanoparticles

# Nano bioconjugates compounds advantages

## Liposomes

- Biocompatibility
- Biodegradability
- Encapsulate hydrophilic/hydrophobic compounds
- Similarity to cell's membranes
- Low cytotoxicity / High delivery rates

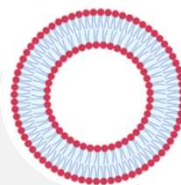

- Nanoparticles as drug delivery vehicles
- Iron oxide nanoparticles ( $\text{Fe}_3\text{O}_4$ )
- Advances in synthesis allows potential applications in diagnostic/therapeutic techniques.

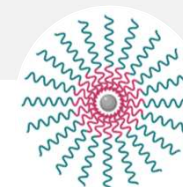

## Nanoparticles

# Nano bioconjugates synthesis technique

- Manufacture devices to **outperforming** traditional analytical and sensing instruments employed in scientific research.
- **Development of several industries:** medical, cosmetics, pharma and food. Low cost devices
- Explored for the synthesis, manipulation, and separation of microscopic encapsulates.
- Explore in silico and in vitro species dynamics to understand **interaction between different phases in a system**

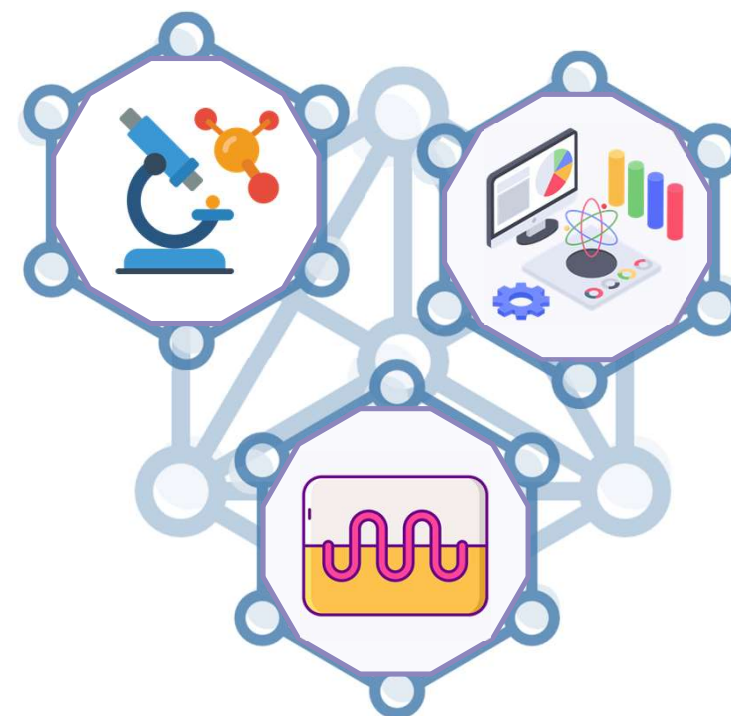



## Objectives

Implement multiphysics simulations to study *in silico* the encapsulation of core-shell, magnetite-chitosan nanoparticles in a microfluidic system by means of the COMSOL Multiphysics® software.

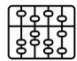

## Euler-Euler (EE) Model

Liposome encapsulation of core-shell, magnetite-chitosan nanoparticles in a microfluidic system using a multiphase Euler-Euler computational model.

### COMSOL Multiphysics Software

Euler-Euler (EE) model

Parameters

| Material         | Property          | Value                                     |
|------------------|-------------------|-------------------------------------------|
| H <sub>2</sub> O | Density           | 997 [kg/m <sup>3</sup> ]                  |
|                  | Dinamic Viscosity | $8.9 \times 10^{-4}$ [Pa * s]             |
| CS-MNP's         | Density           | 1100[kg/m <sup>3</sup> ]                  |
|                  | Diffusivity       | $1.0 \times 10^{-9}$ [m <sup>2</sup> /s]  |
| Liposomes        | Density           | 1000[kg/m <sup>3</sup> ]                  |
|                  | Diffusivity       | $1.51 \times 10^{-5}$ [m <sup>2</sup> /s] |

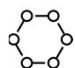

## Euler-Euler (EE) Model

### Mass Balance

Continuity relations for continuous and dispersed phases

#### Continuous phase (liposomes)

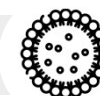

$$\frac{\partial}{\partial t}(\rho_c \Phi_c) + \nabla \cdot (\rho_c \Phi_c u_c) = m_{dc}$$

#### Dispersed phase (CS-MNPs)

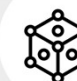

$$\frac{\partial}{\partial t}(\rho_d \Phi_d) + \nabla \cdot (\rho_d \Phi_d u_d) = -m_{dc}$$

Where

- $\Phi$  = volume fraction (dimensionless)
- $\rho$  = density ( $\text{Kg}/\text{m}^3$ )
- $u$  = velocity (m/s)
- $m_{dc}$  = mass transfer rate



## Euler-Euler (EE) Model

### Mass Balance

Relation between volume fractions. Continuous and dispersed phases considered incompressible

$$\Phi_c = 1 - \Phi_d$$

Continuous phase (liposomes)

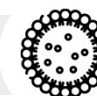

$$\frac{\partial \Phi_c}{\partial t} + \nabla \cdot (\Phi_c u_c) = \frac{m_{dc}}{\rho_c}$$

Dispersed phase (CS-MNPs)

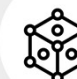

$$\frac{\partial \Phi_d}{\partial t} + \nabla \cdot (\Phi_d u_d) = \frac{-m_{dc}}{\rho_d}$$

Compute volume fraction

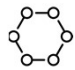

## Euler-Euler (EE) Model

### Mass Balance

Continuity equation continuous phase mass balance and dispersed phase mass balance

$$\nabla \cdot (\Phi_c u_c) + \nabla \cdot (\Phi_d u_d) = \frac{m_{dc}}{\rho_c} - \frac{m_{dc}}{\rho_d} \quad \Phi_c = 1 - \Phi_d$$

$$\nabla \cdot [(1 - \Phi_d)u_c + (\Phi_d u_d)] = m_{dc} \left( \frac{1}{\rho_c} - \frac{1}{\rho_d} \right) \quad \text{Compute mixture pressure}$$



## Euler-Euler (EE) Model

### Momentum Balance

For fluid-solids mixtures where  $\rho_d \gg \rho_c$ , momentum balanced dispersed phase is modified in the manner of Enwald

Continuous phase (liposomes)

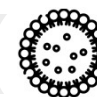

$$\rho_c \Phi_c \left[ \frac{\partial}{\partial t} (u_c) + u_c \nabla \cdot (u_c) \right] = -\Phi_c \nabla p + \underbrace{\Phi_d \nabla \cdot \tau_d}_{\nabla p_s} + \Phi_c p_c \mathbf{g} + \mathbf{F}_{m,c} + \Phi_c \mathbf{F}_c - m_{dc} (u_{int} - u_c)$$

Dispersed phase (CS-MNPs)

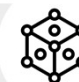

$$\rho_d \Phi_d \left[ \frac{\partial}{\partial t} (u_d) + u_d \nabla \cdot (u_d) \right] = -\Phi_d \nabla p + \underbrace{\Phi_d \nabla \cdot \tau_d}_{\nabla p_s} + \Phi_d p_d \mathbf{g} + \mathbf{F}_{m,d} + \Phi_d \mathbf{F}_d - m_{dc} (u_{int} - u_d)$$

Where

- $p_s$  = solid pressure (Pa)
- $\tau$  = viscous stress tensor (Pa)

Momentum balance was assumed Newtonian fluid





## Euler-Euler (EE) Model

### Viscous Stress Tensors

Continuous phase (liposomes)

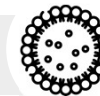

$$\tau_c = \mu_c^m \left( \nabla u_c + (u_c)^T - \frac{2}{3} (\nabla \cdot u_c) I \right)$$

Dispersed phase (CS-MNPs)

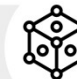

$$\tau_d = \mu_d^m \left( \nabla u_d + (u_d)^T - \frac{2}{3} (\nabla \cdot u_d) I \right)$$

Where  $\mu_c^m, \mu_d^m = \text{dynamic viscosity (Pa)}$



## Euler-Euler (EE) Model

### Momentum Balance

Using nonconservative forms

Dispersed phase (CS-MNPs)

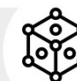

$$\rho_c \left[ \frac{\partial}{\partial t} (u_d) + u_d \nabla \cdot (u_d) \right] = -\nabla p + \nabla \cdot \tau_d + \rho_d \mathbf{g} + \frac{\mathbf{F}_{m,d}}{d} + \mathbf{F}_d - \frac{m_{dc}(u_{int} - u_d)}{d}$$

Where

- $p$  = mixture pressure (Pa) **equal for two phases**
- $\tau$  = viscous stress tensor (Pa)
- $\mathbf{g}$  = vector of gravitational acceleration ( $m/s^2$ )
- $\mathbf{F}_m$  = interphase momentum transfer term ( $N/m^3$ )
- $\mathbf{F}$  = volume force term ( $N/m^3$ )
- $u_{int}$  = interphase velocity (m/s)



# Euler-Euler (EE) Model

## Viscosity Models

Dispersed phase (CS-MNPs)

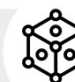

Krieger Type

$$\mu_{mix} = \mu_c \left( 1 - \frac{\Phi_d}{\Phi_{d,max}} \right)^{-2.5\Phi_{d,max}}$$

Where

Maximum packing limit

$$\Phi_{d,max} = 0.62$$



## Euler-Euler (EE) Model

### Damping functions - Wall BC

#### Lam and Bremhorst EE Model (LB)

$$E = 0$$

$$\varepsilon_w = \nu \left( \frac{\partial^2 k}{\partial y^2} \right) \quad \text{Wall Function}$$

Viscous stress tensor related term

#### Yang et al. EE Model (YS)

$$E = \nu v_t \left( \frac{\partial^2 U^2}{\partial y^2} \right)$$

$$\varepsilon_w = \nu \left( \frac{\partial^2 k}{\partial y^2} \right) \quad \text{Wall Function}$$

Viscous stress tensor related term

# Manufacturing Process

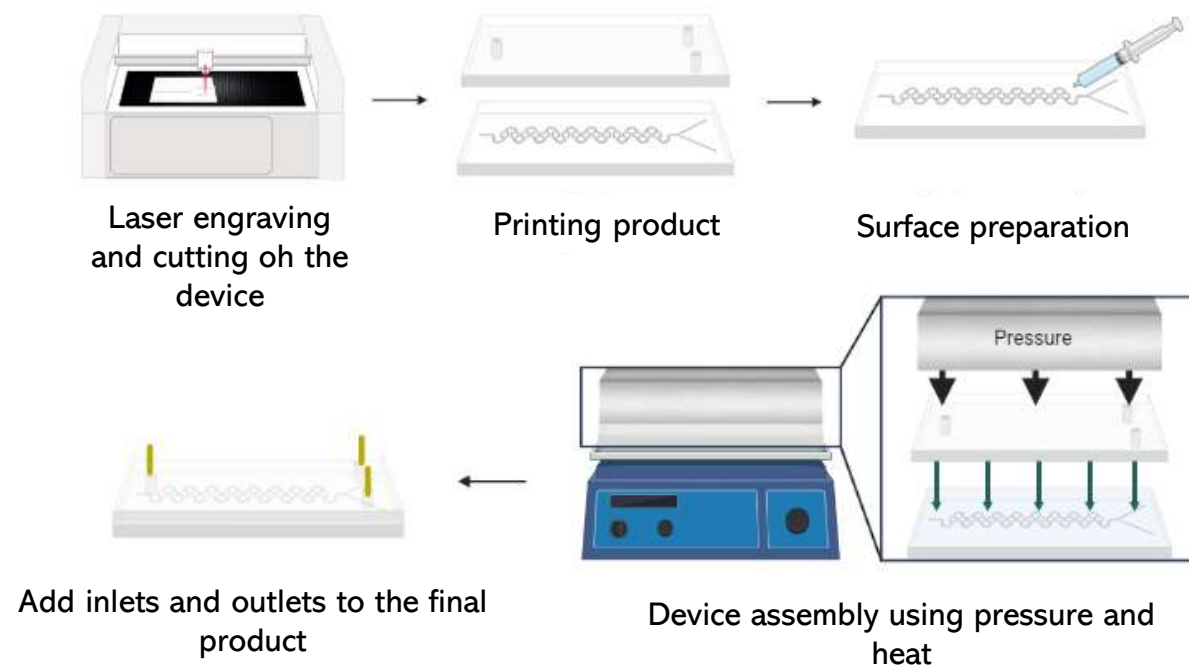

Figure 1. Manufacturing process

# Geometries and Boundary conditions

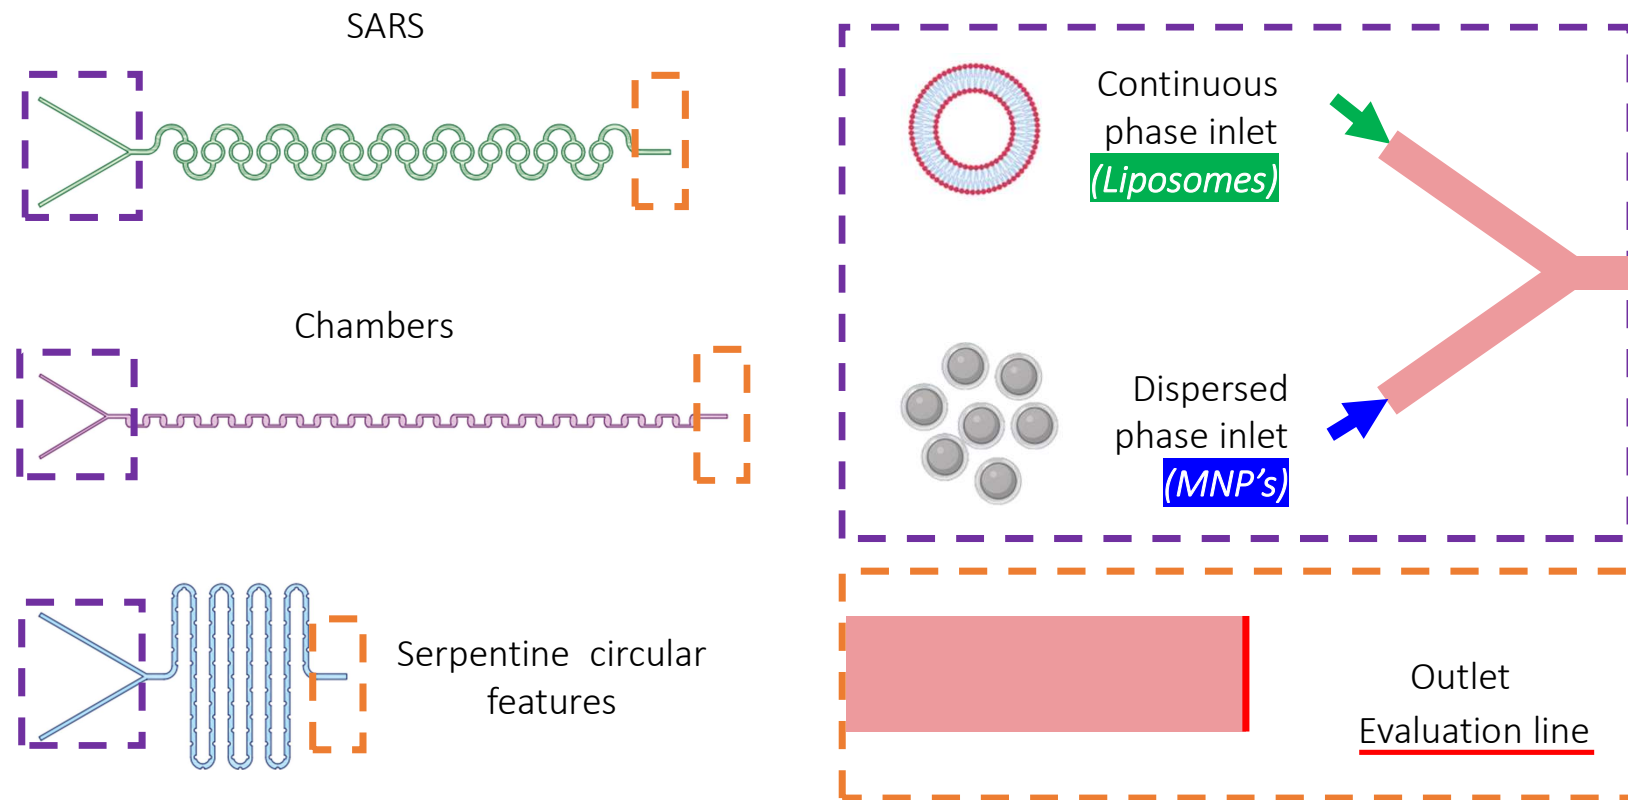

Figure 2. Geometries and boundary conditions, inlets, outlets and evaluation lines



# Mesh selection

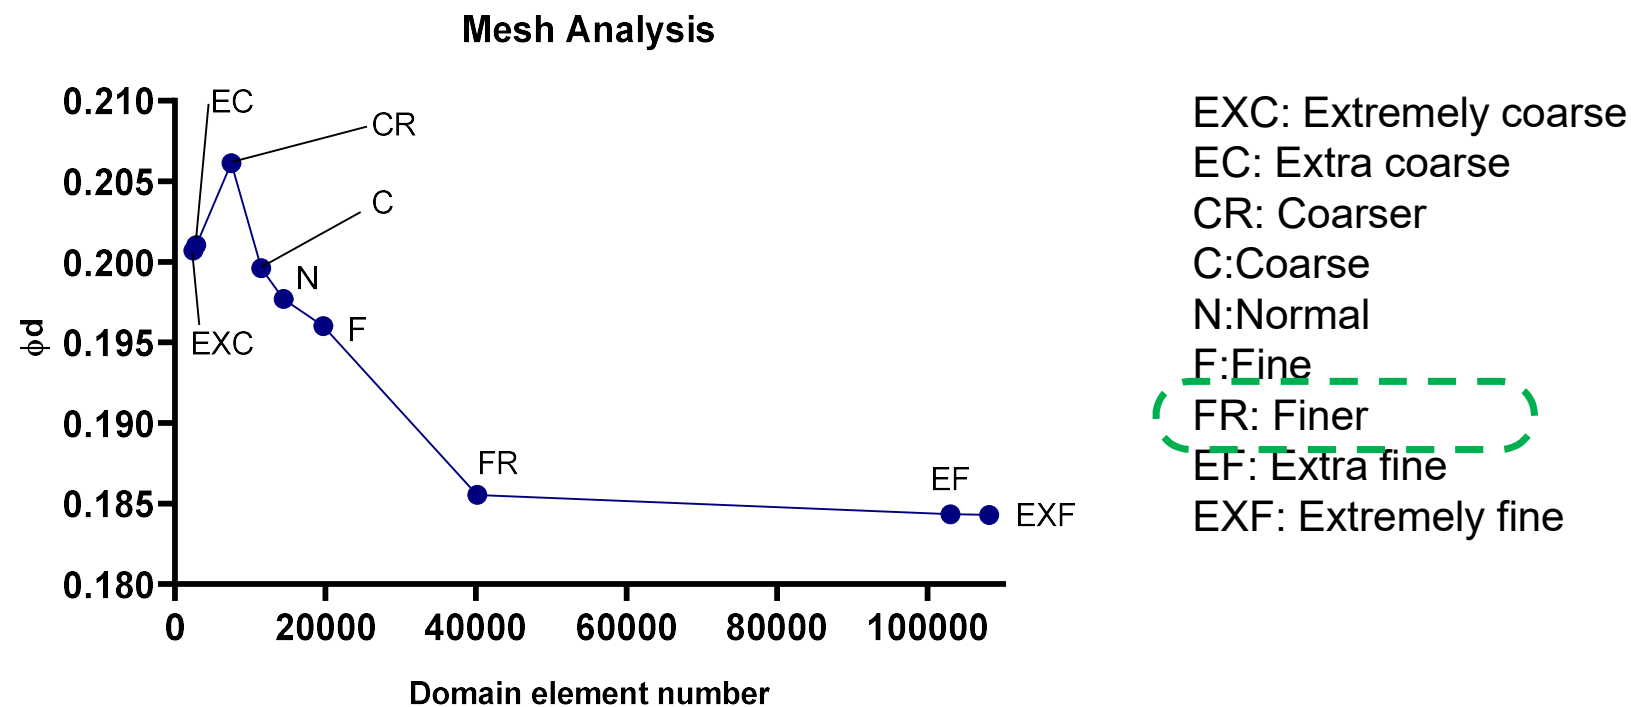

Figure 3. Mesh convergence analysis for SARS geometry. Complete mesh consist of 40175 domain elements

# Mesh selection

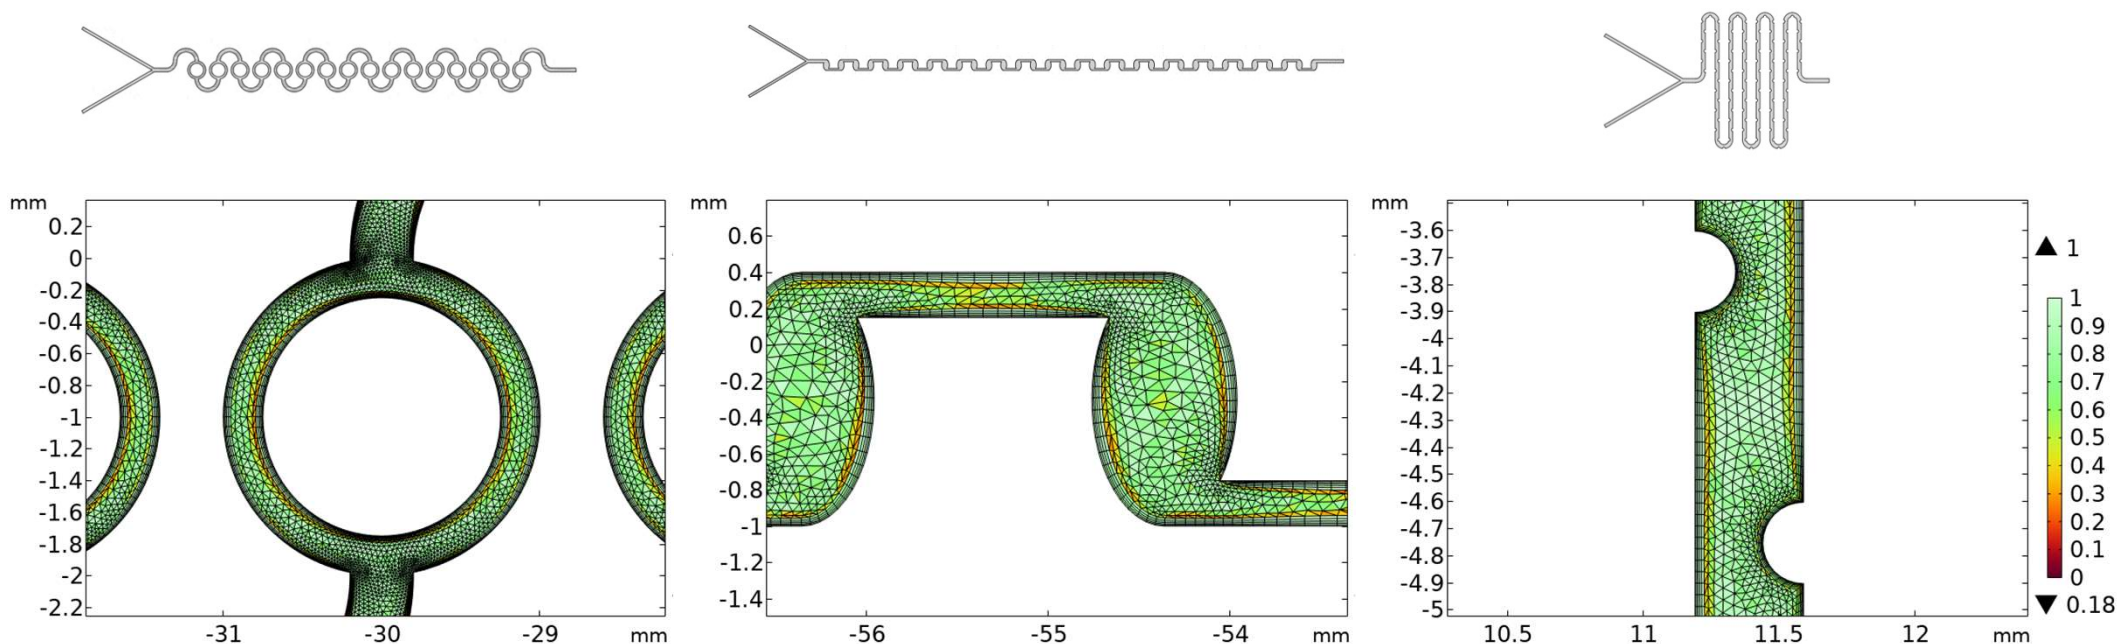

Figure 4. Mesh quality. Left to right: SARS, Chambers and Serpentine circular features geometry

# Dispersed phase Volume fraction

## Chambers

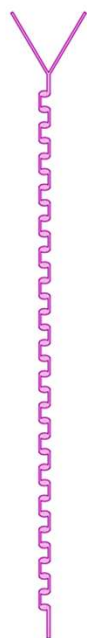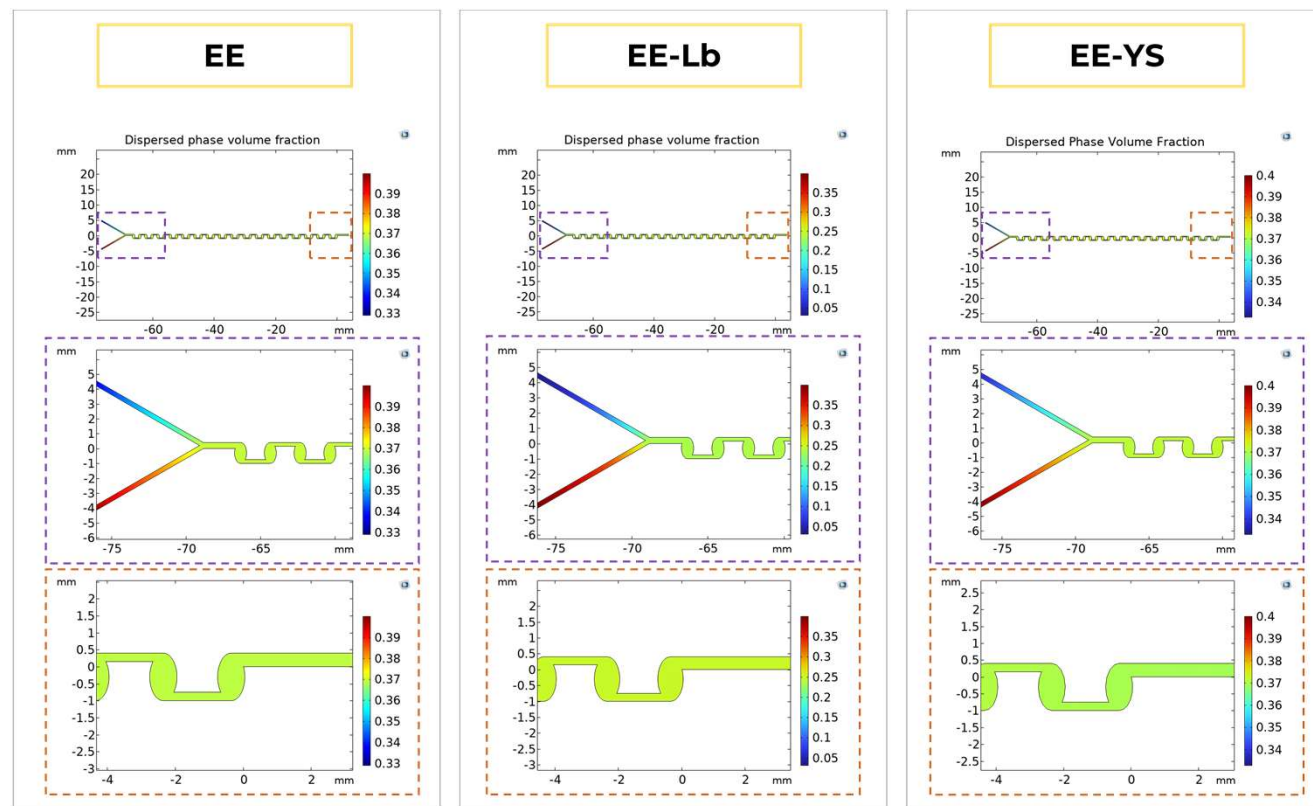

Figure 5. Dispersed phase volume fraction using variations in EE Model in chambers geometry

# Dispersed phase Volume fraction

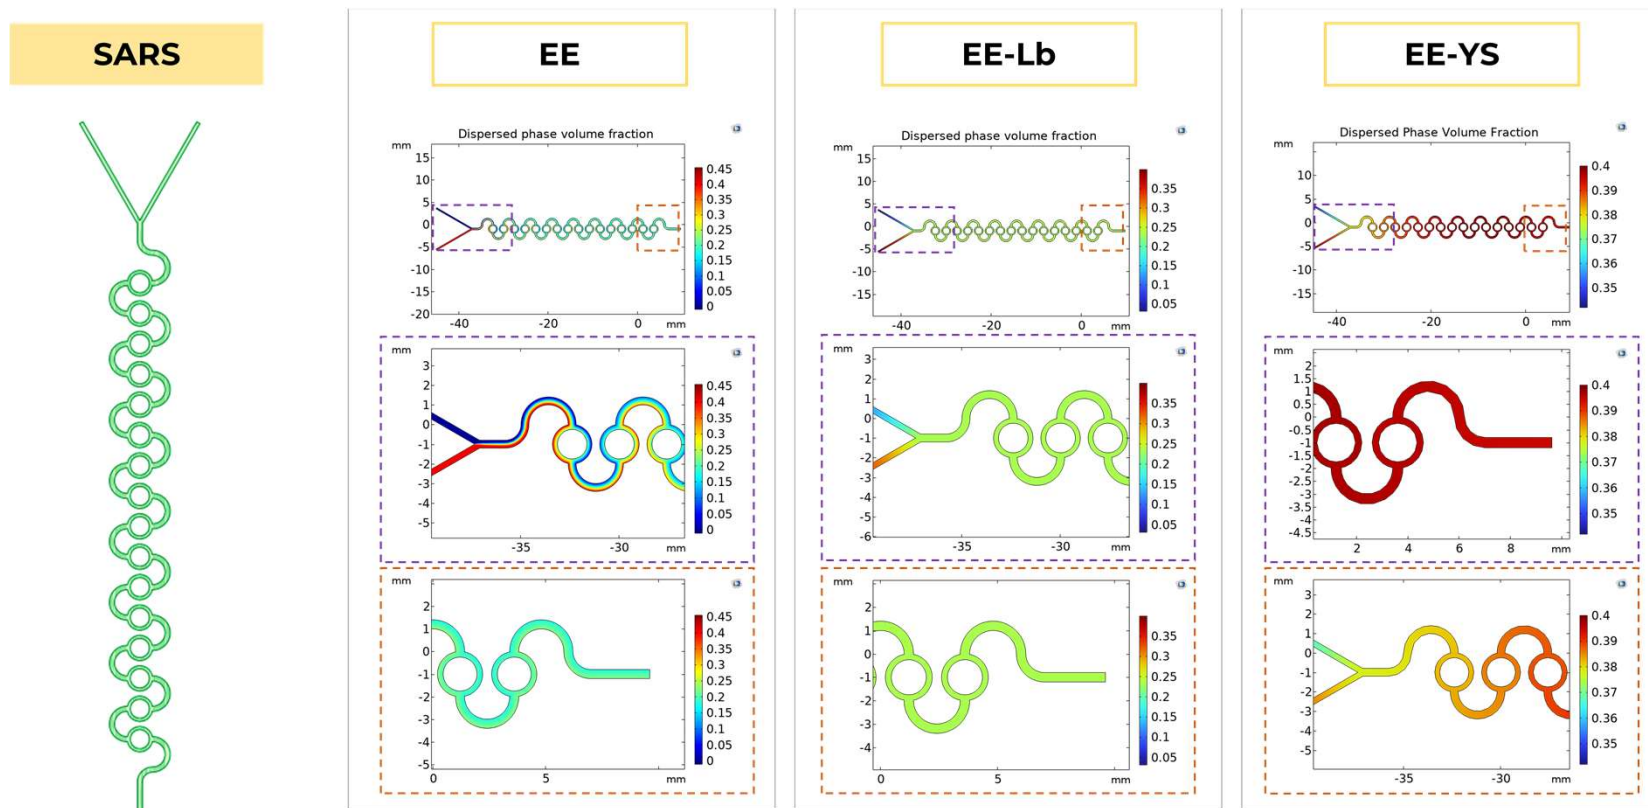

Figure 6. Dispersed phase volume fraction using variations in EE Model in SARS geometry

# Dispersed phase Volume fraction

**Serpentine  
Circular  
Features**

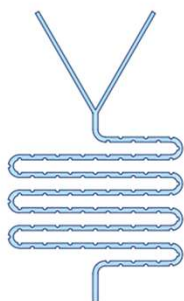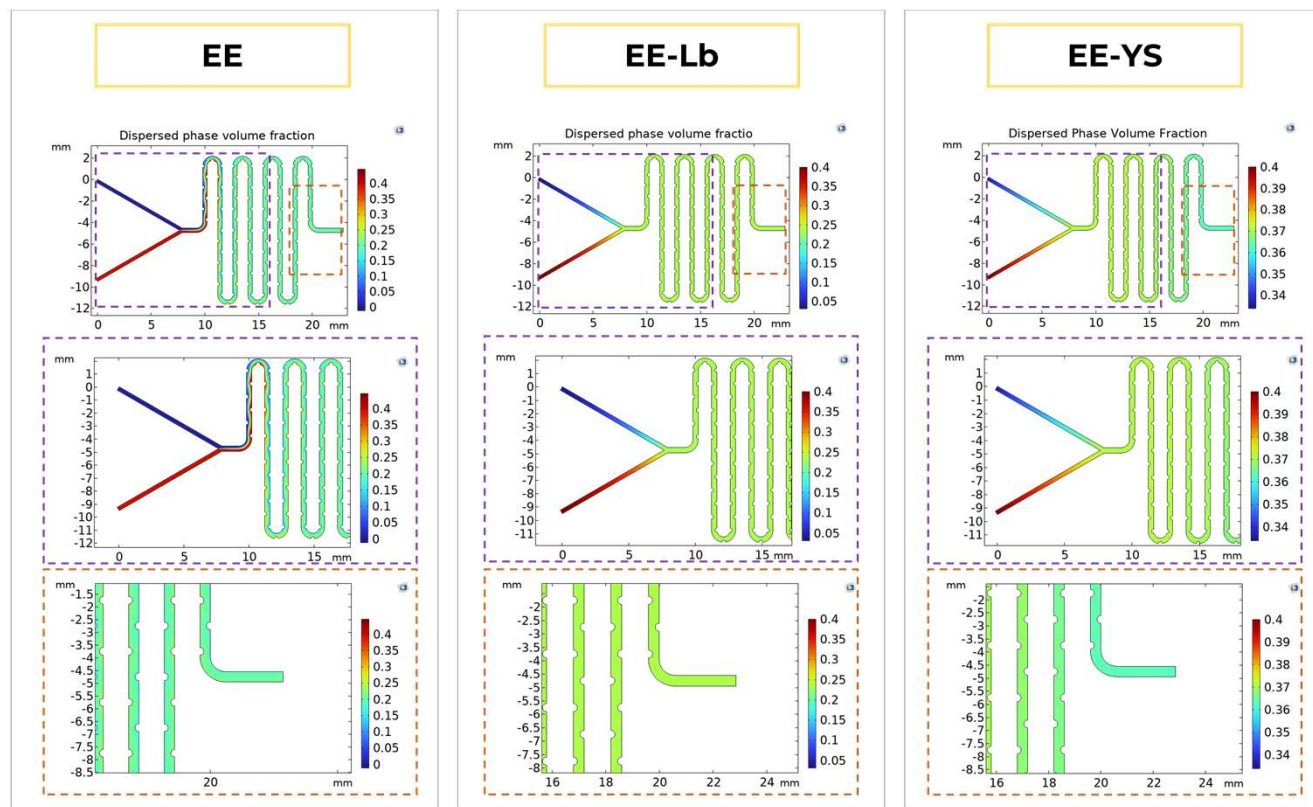

Figure 7. Dispersed phase volume fraction using variations in EE Model in serpentine CF geometry



# Encapsulation Efficiency (EE%)

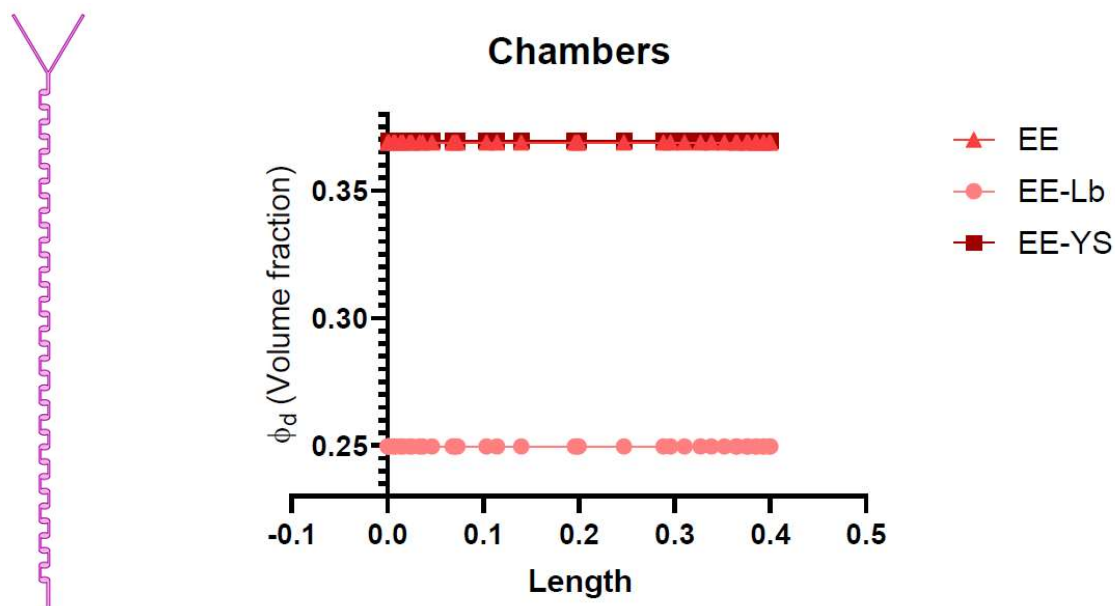

$$EE\% = \left( \frac{\phi_{d,min}}{\phi_d / FRR} \right) \times 100$$

$$EE \ EE\% = 38.69$$

$$EE \ Lb \ EE\% = 58.48$$

$$EE \ Ys \ EE\% = 98.69$$

Figure 8. Encapsulation efficiency Volume fraction variation by length in chambers geometry



# Encapsulation Efficiency (EE%)

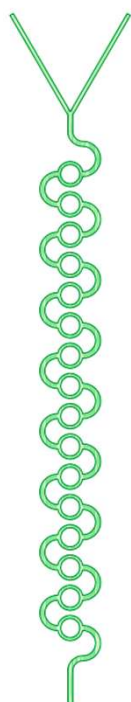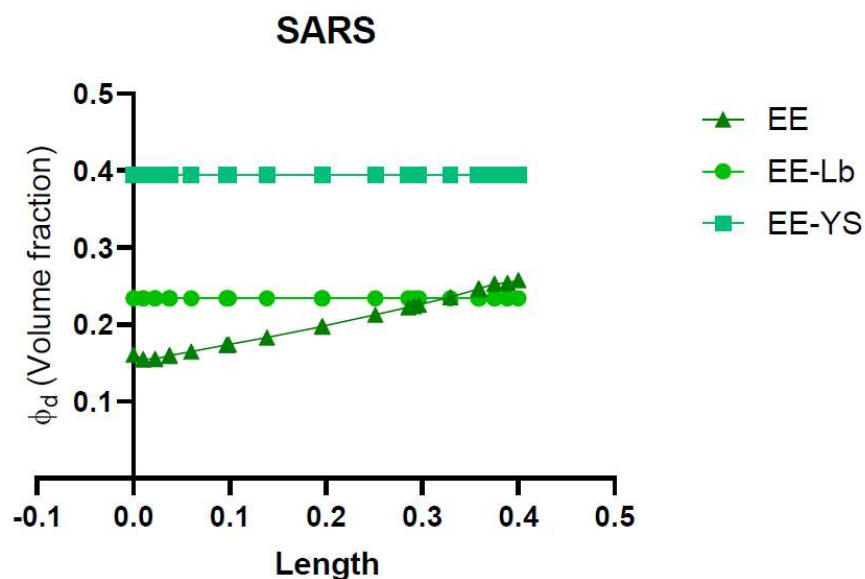

$$EE\% = \left( \frac{\phi_{d,min}}{\phi_d / FRR} \right) \times 100$$

$$EE \ EE\% = 47.58$$

$$EE \ Lb \ EE\% = 58.71$$

$$EE \ Ys \ EE\% = 90.79$$

Figure 9. Encapsulation efficiency Volume fraction variation by length in SARS geometry

# Encapsulation Efficiency (EE%)

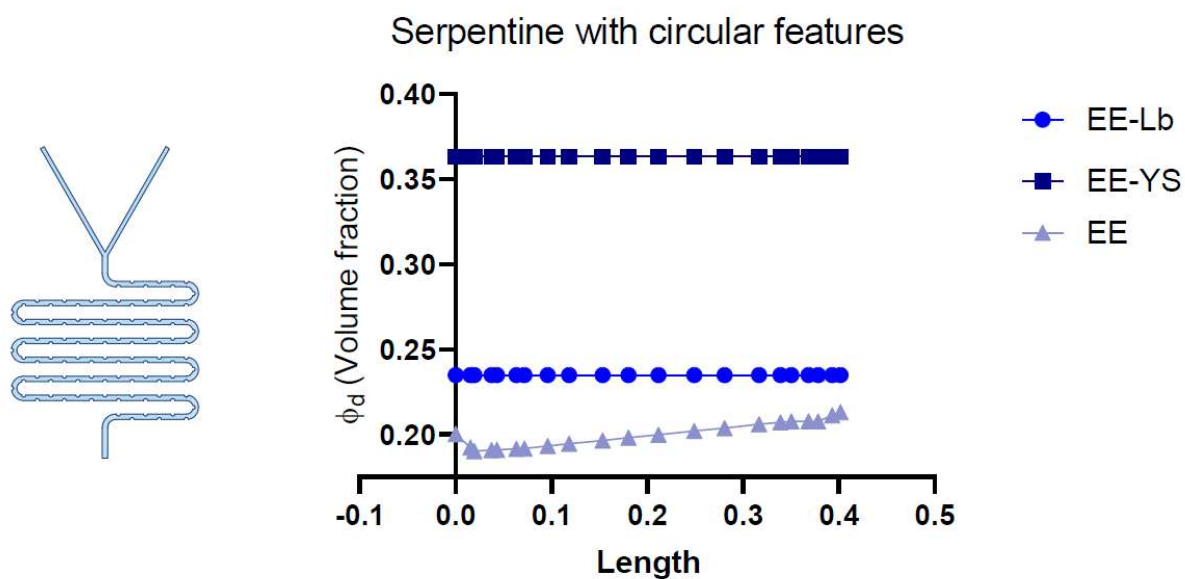

$$EE\% = \left( \frac{\phi_{d,min}}{\phi_d / FRR} \right) \times 100$$

$$EE \ EE\% = 92.18$$

$$EE \ Lb \ EE\% = 62.38$$

$$EE \ Ys \ EE\% = 92.33$$

Figure 10. Encapsulation efficiency Volume fraction variation by length in serpentine CF geometry

# Encapsulation Efficiency (EE%)

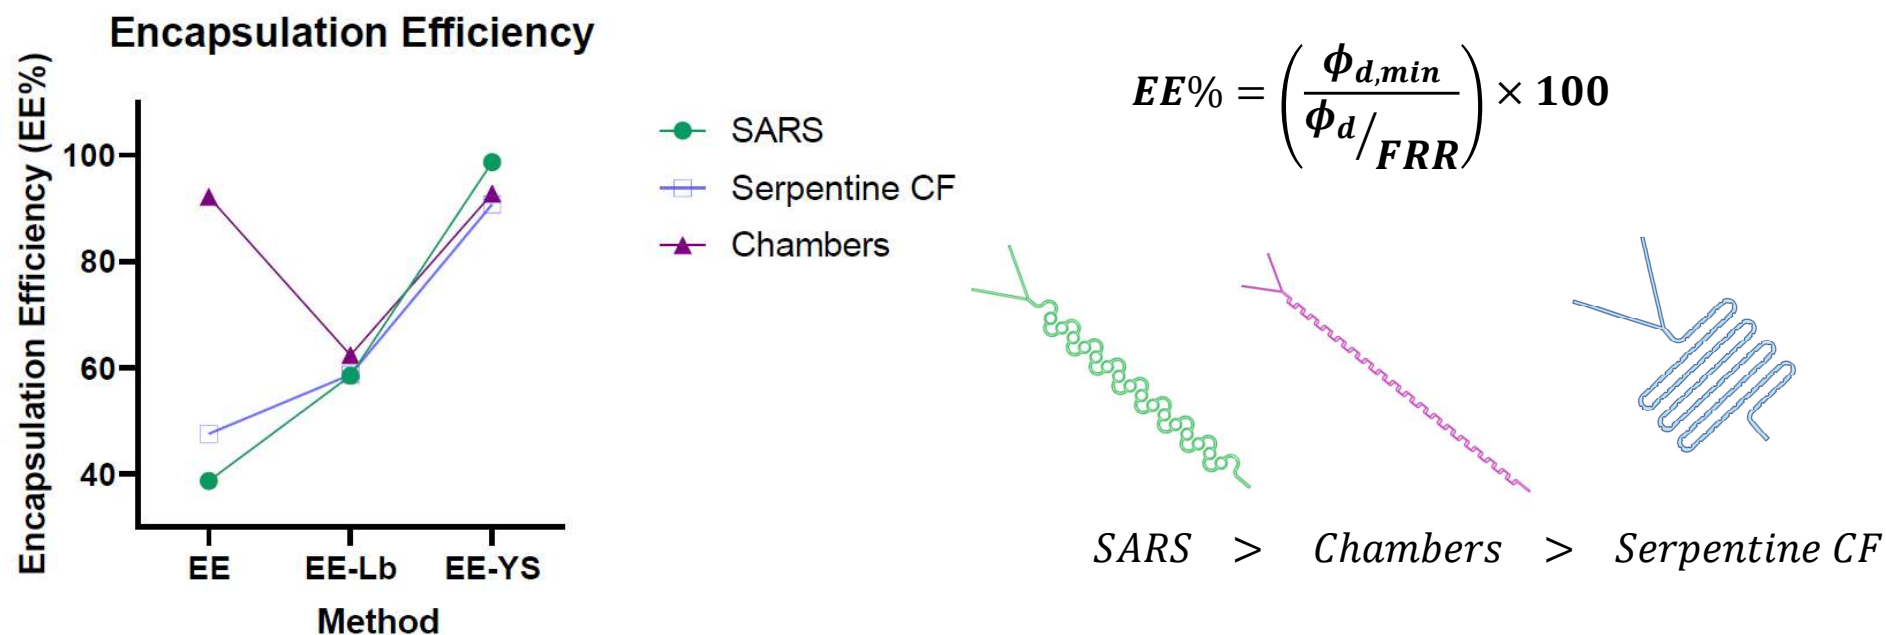

Figure 11. Encapsulation efficiency Volume fraction variation by length. Comparative graph

# Encapsulation Efficiency (EE%)

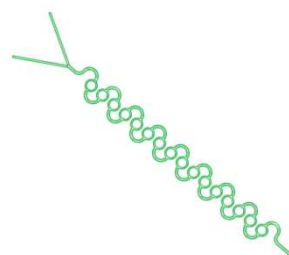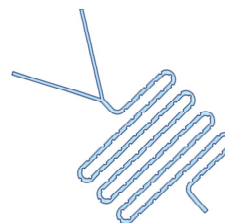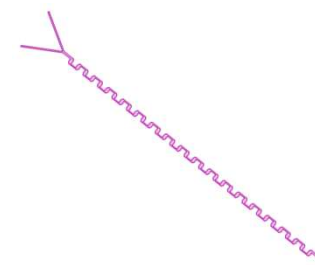

Table 2. Encapsulation efficiency contrast between geometries and math models

| Model/Geometry | SARS  | Serp CF | Chambers |
|----------------|-------|---------|----------|
| EE             | 38.69 | 47.58   | 92.18    |
| EE-Lb          | 58.48 | 58.71   | 62.38    |
| EE-YS          | 98.69 | 90.79   | 92.33    |

## Conclusions

- By implementing near-wall damping functions in the Euler-Euler approximation, it is possible to model the mixing process more effectively as they address the **turbulence phenomena at low Reynolds numbers by balancing the rate of of kinetic energy dissipation** and thus ensure a better encapsulation process.
- The LB and YS turbulence models had the best performance, obtaining EE% between **58.48-62.38% and 90.79-98.69%** respectively.
- The Euler-Euler model was sufficient for the analysis; however, **stochastic** processes related to the mixing process will be considered in future work.
- According to the YS model with damping functions, the micromixer with the channel SARS geometry led to the highest EE%, i.e., 98.69%.

Modeling and simulation of magnetoliposome formation by encapsulation of core-shell, magnetite-chitosan nanoparticles in liposomes enabled by a low-cost microfluidic system.

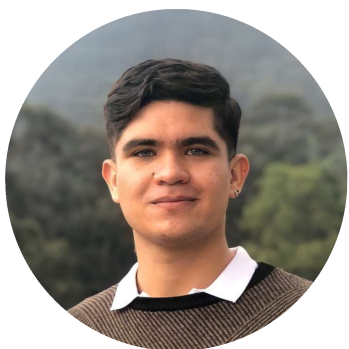

Andres D. Mantilla BSc.

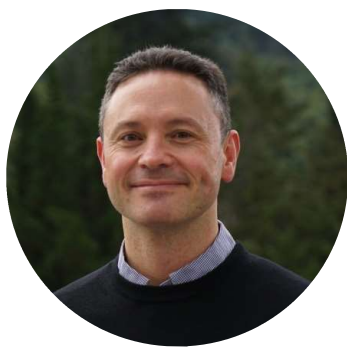

Juan C. Cruz PhD

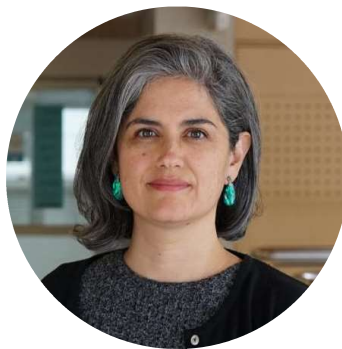

Carolina Muñoz-Camargo PhD

**Thank you**  
for your attention
